# Supplementary material for: Identification of a Novel Muscle A-type Lamin-interacting Protein (MLIP)
Source: PubMed Central journal article supplement — J Biol Chem. 2011 Apr 15;286(22):19702–13. doi: 10.1074/jbc.M110.165548 (PMC3103349; doi:10.1074/jbc.m110.165548), 2011-04-15
Supplement: supp_M110.165548_jbc.M110.165548-1.pdf [file supp_M110.165548_jbc.M110.165548-1.pdf]

## Supplementary Figure 3

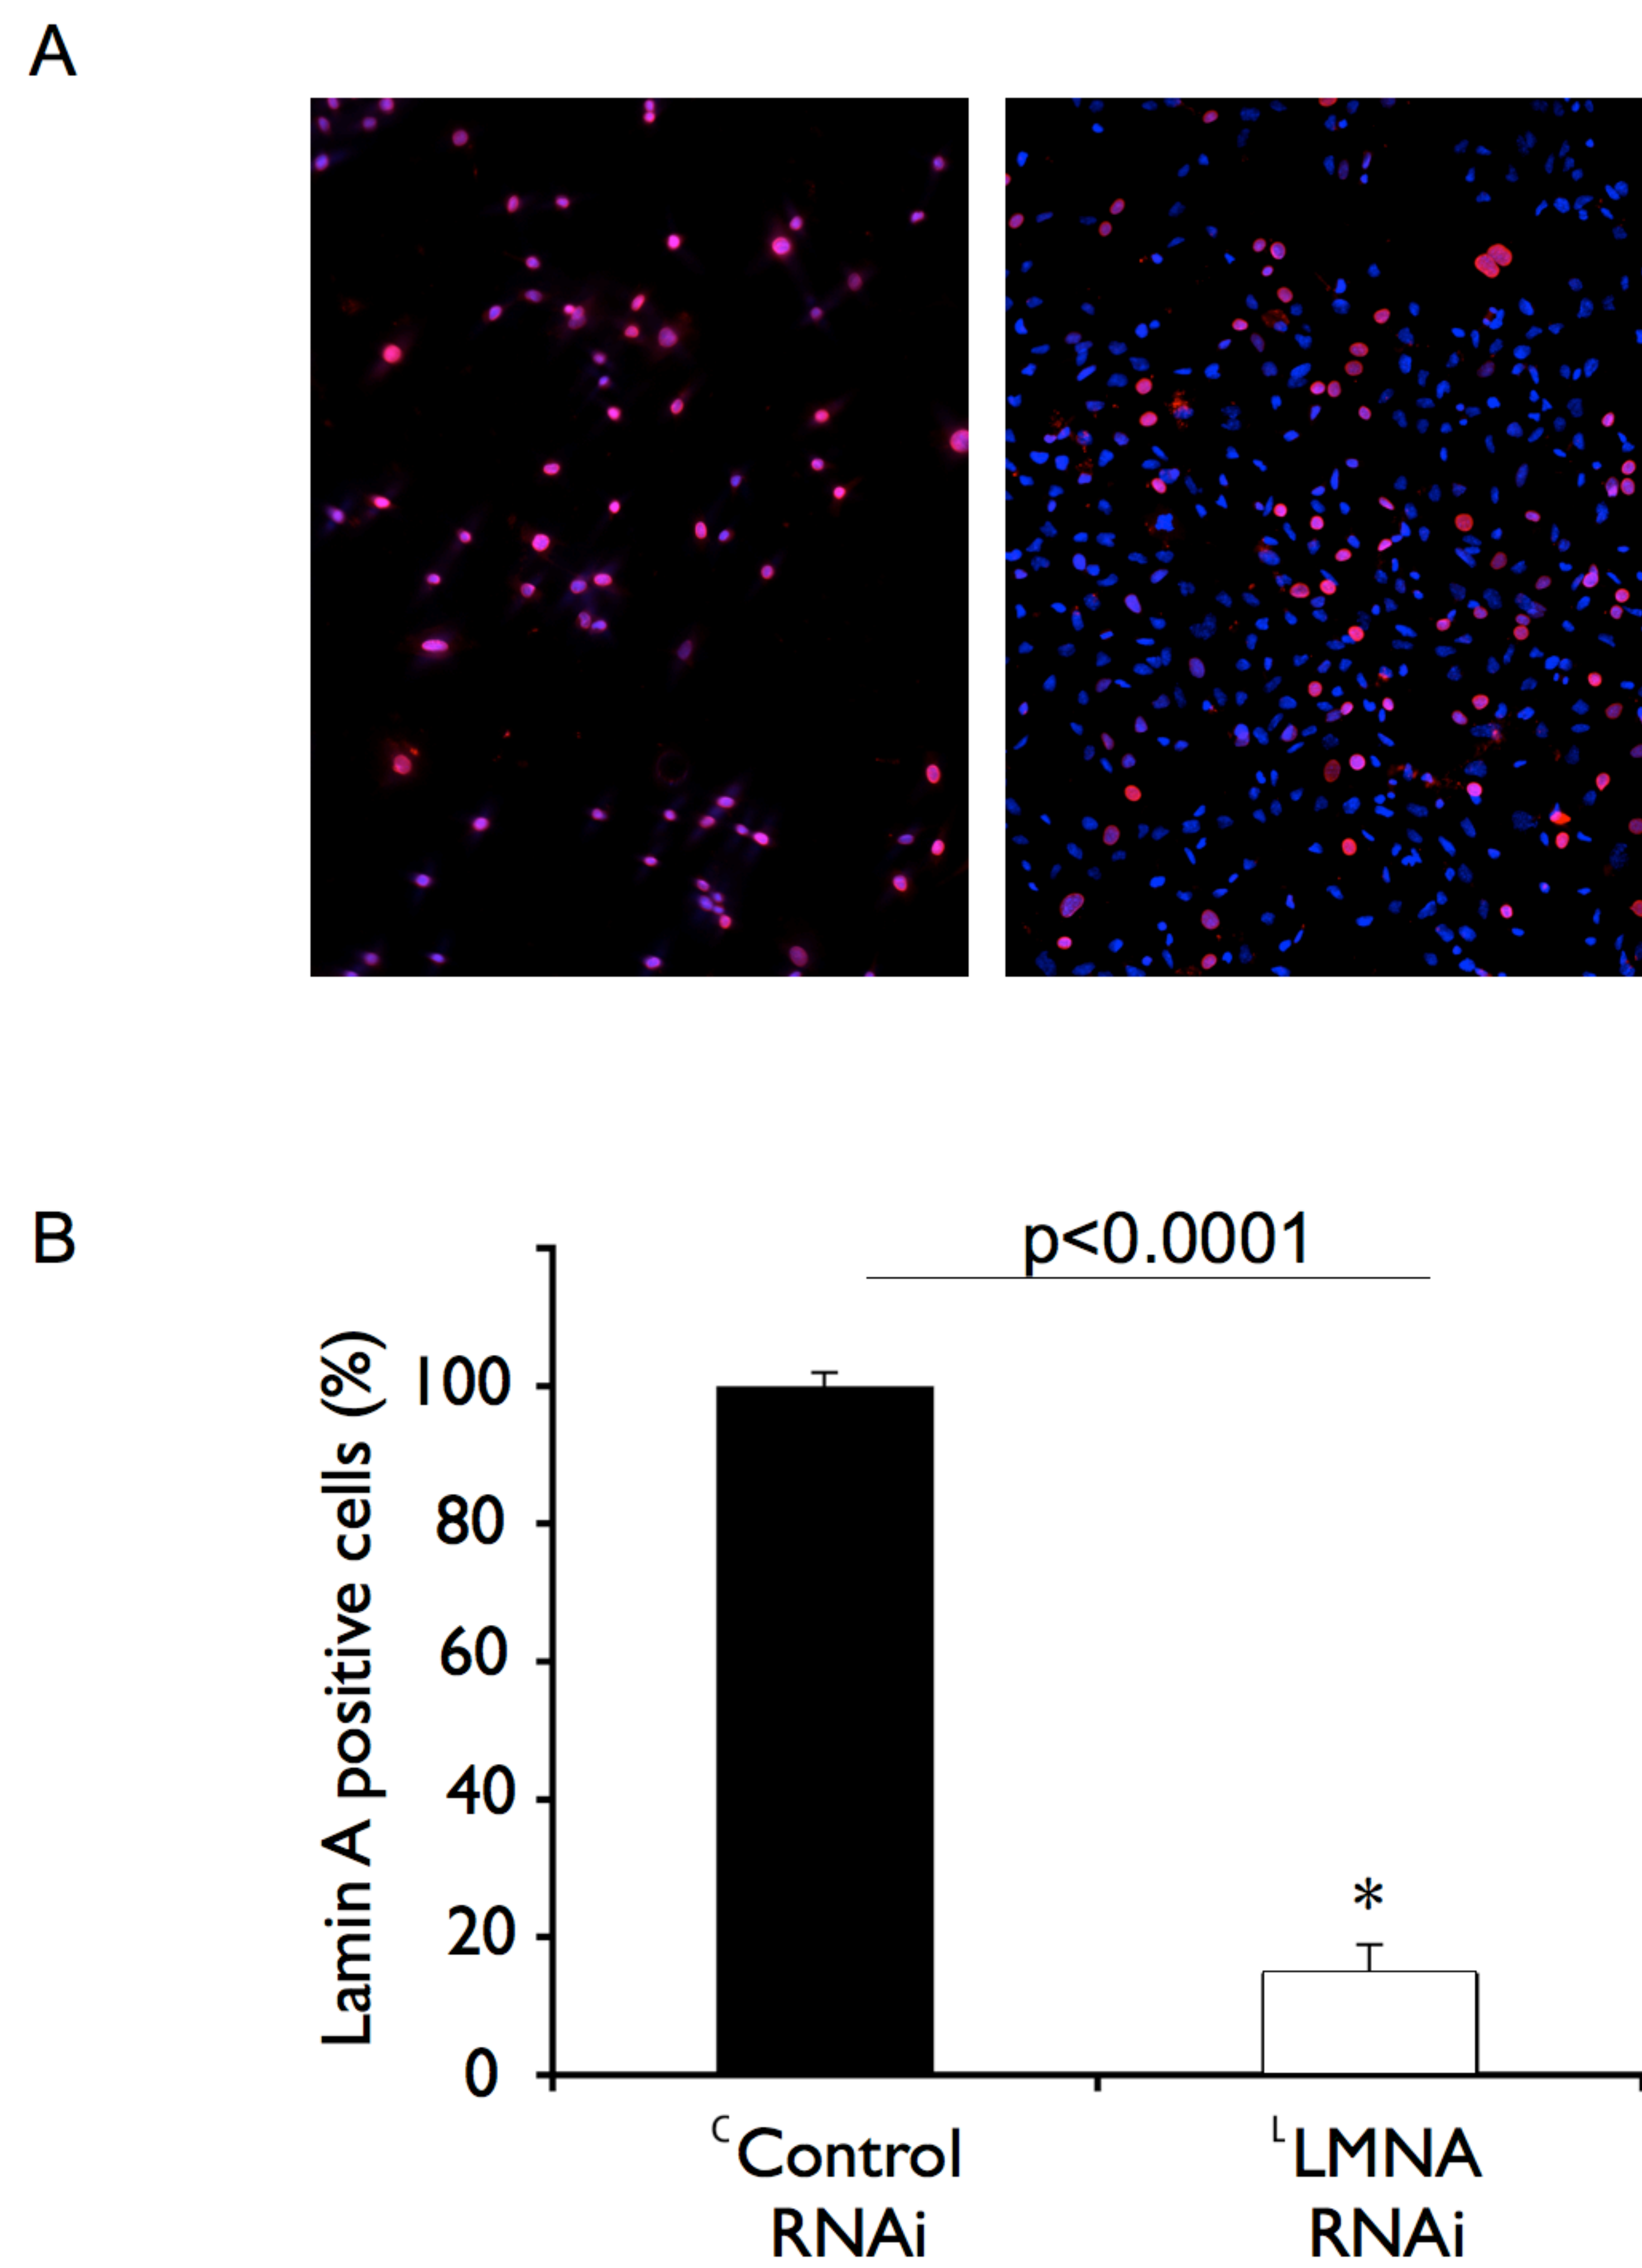

Supplementary Fig. 3. A) Immunostained C<sub>2</sub>C<sub>12</sub> myoblasts infected with non-specific shRNAi (left panel) and downregulated for Lamin A by shRNA treatment (right panel). Lamin A is in red and DAPI is in blue. B) Quantification of Lamin A downregulation by shRNA as compared to non-specific shRNAi.
