# Supplementary material for: Identification of a Novel Muscle A-type Lamin-interacting Protein (MLIP)
Source: PubMed Central journal article supplement — J Biol Chem. 2011 Apr 15;286(22):19702–13. doi: 10.1074/jbc.M110.165548 (PMC3103349; doi:10.1074/jbc.m110.165548), 2011-04-15
Supplement: supp_M110.165548_jbc.M110.165548-3.pdf [file supp_M110.165548_jbc.M110.165548-3.pdf]

Supplementary Figure 2

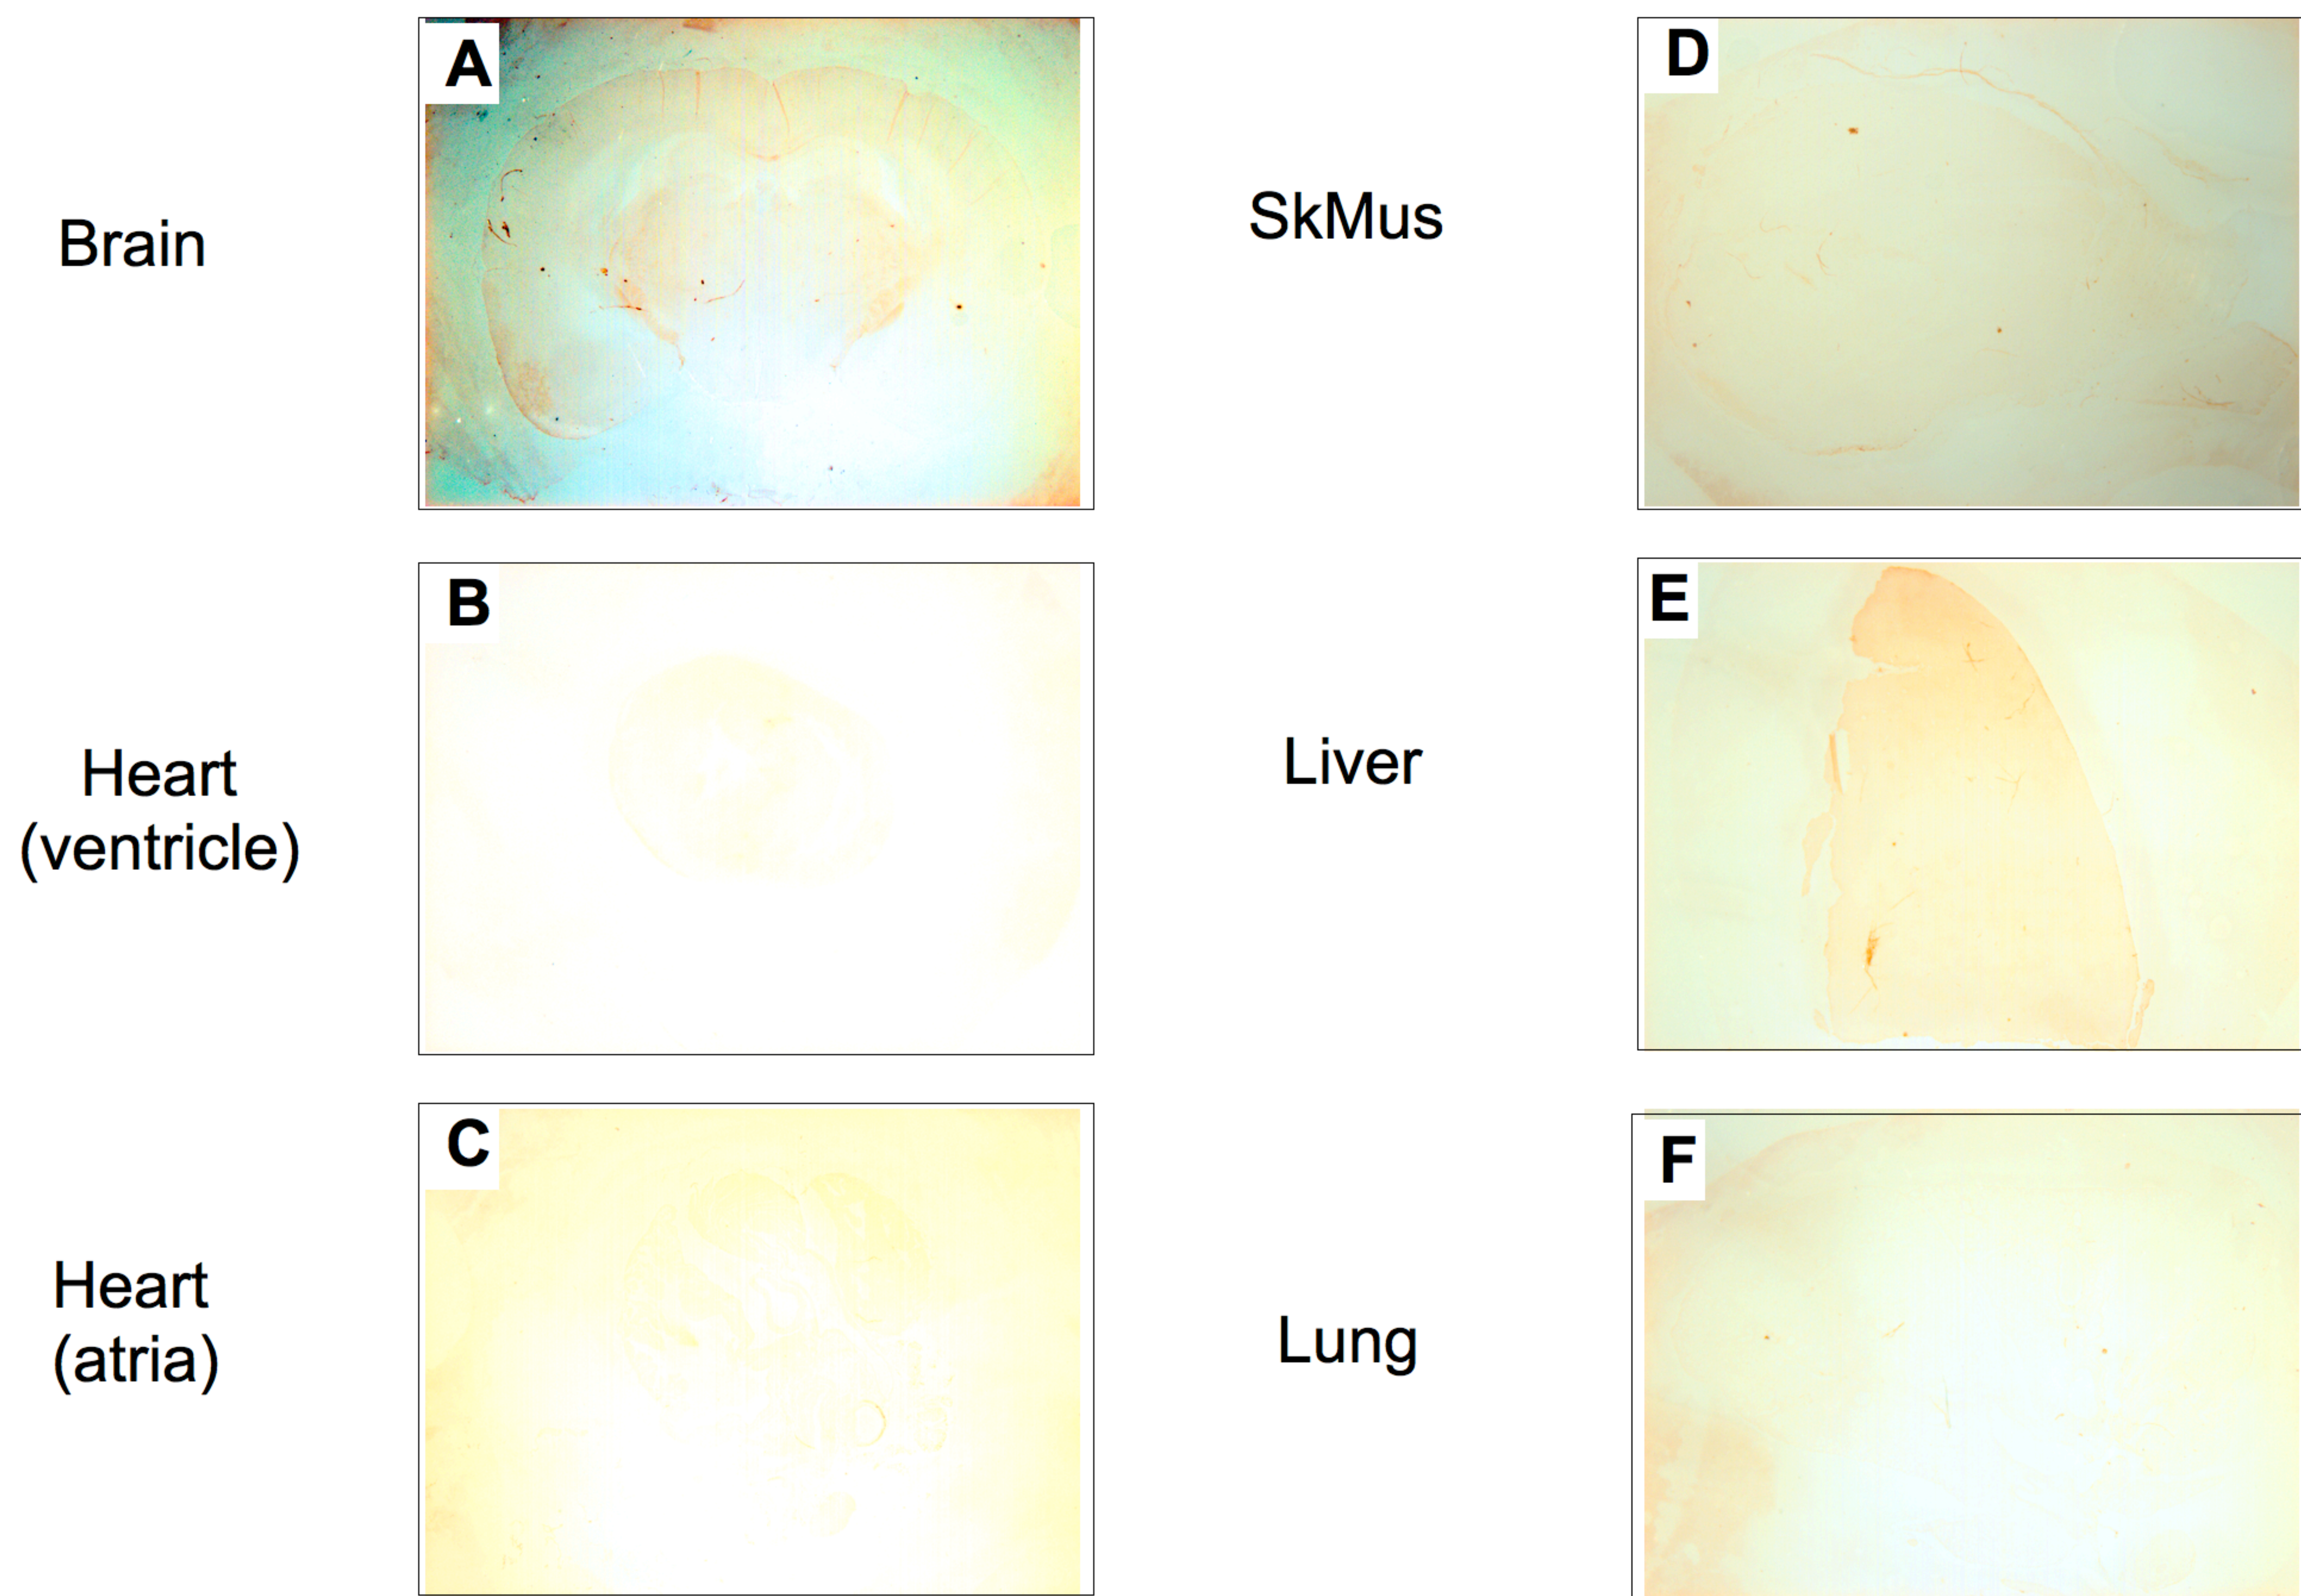

Supplementary Fig. 2. MLIP Peptide neutralization of the anti-MLIP sera demonstrates the specificity of the MLIP antibodies in indirect immunohistochemistry on mouse tissues. A) Brain, B) Heart Ventricles, C) Atria, D) skeletal muscle, E) Liver and F) Lung.
